# Supplementary material for: Comparison of neonatal intensive care: Trento area versus Vermont Oxford Network
Source: PubMed Central journal article supplement (PMC2687545; doi:10.1186/1824-7288-35-5), 2009-03-14
Supplement: 1824-7288-35-5-S1.pdf [file 1824-7288-35-5-S1.pdf]

**Tab. 1.** Baseline data for the Trento and VON populations.

|                                                   | 501-750 g    |              | 751-1000 g   |               | 1001-1250 g   |               | 1251-1500 g   |                | All 501-1500 g |                |
|---------------------------------------------------|--------------|--------------|--------------|---------------|---------------|---------------|---------------|----------------|----------------|----------------|
|                                                   | Trento       | VON          | Trento       | VON           | Trento        | VON           | Trento        | VON            | Trento         | VON            |
| <b>Number of cases</b>                            | 34           | 7614         | 50           | 8943          | 80            | 10003         | 86            | 12335          | 250            | 38895          |
| <b>Birth weight (mean <math>\pm</math> SD)</b>    | 649 $\pm$ 53 | 637 $\pm$ 58 | 861 $\pm$ 64 | 872 $\pm$ 130 | 1139 $\pm$ 69 | 1135 $\pm$ 93 | 1387 $\pm$ 61 | 1373 $\pm$ 196 | 1081 $\pm$ 241 | 1053 $\pm$ 261 |
| <b>Gestational age (mean <math>\pm</math> SD)</b> | 25 $\pm$ 1.4 | *            | 27 $\pm$ 1.8 | *             | 29 $\pm$ 2.0  | *             | 31 $\pm$ 1.6  | *              | 28 $\pm$ 2.9   | *              |
| <b>Male (%)</b>                                   | 47           | 50           | 28           | 52            | 49            | 51            | 45            | 51             | 43             | 51             |

\* *not found*
