# Supplementary material for: Comparison of neonatal intensive care: Trento area versus Vermont Oxford Network
Source: PubMed Central journal article supplement (PMC2687545; doi:10.1186/1824-7288-35-5), 2009-03-14
Supplement: 1824-7288-35-5-S2.pdf [file 1824-7288-35-5-S2.pdf]

**Tab. 2.** Prenatal data for the Trento and VON populations.

|                                  | 501-750 g   |               |                  | 751-1000 g  |               |                  | 1001-1250 g |               |                  | 1251-1500 g |                |                  | All 501-1500 g |                |                  |
|----------------------------------|-------------|---------------|------------------|-------------|---------------|------------------|-------------|---------------|------------------|-------------|----------------|------------------|----------------|----------------|------------------|
|                                  | Trento      | VON           | OR (95% CI)      | Trento      | VON           | OR (95% CI)      | Trento      | VON           | OR (95% CI)      | Trento      | VON            | OR (95% CI)      | Trento         | VON            | OR (95% CI)      |
|                                  |             |               | MH ( $p$ -value) |             |               | MH ( $p$ -value) |             |               | MH ( $p$ -value) |             |                | MH ( $p$ -value) |                |                |                  |
| <b>Number of cases</b>           | 34          | 7614          |                  | 50          | 8943          |                  | 80          | 10003         |                  | 86          | 12335          |                  | 250            | 38895          |                  |
| <b>Inborn</b>                    | 33<br>(97%) | 6320<br>(83%) | 6.76 (0.99-133.) | 44<br>(88%) | 7244<br>(81%) | 1.72 (0.70-4.49) | 71<br>(89%) | 8403<br>(84%) | 1.50 (0.72-3.22) | 79<br>(92%) | 10485<br>(85%) | 1.99 (0.89-4.71) | 227<br>(91%)   | 32672<br>(84%) | 1.88 (1.20-2.96) |
|                                  |             |               | 4.75 (0.03)      |             |               | 1.58 (0.21)      |             |               | 1.33 (0.25)      |             |                | 3.16 (0.08)      |                |                | 8.56 (0.003)     |
| <b>Prenatal steroids</b>         | 26<br>(76%) | 5101<br>(67%) | 1.60 (0.69-3.84) | 39<br>(78%) | 6797<br>(76%) | 1.12 (0.55-2.32) | 70<br>(88%) | 7802<br>(78%) | 1.97 (0.98-4.08) | 69<br>(80%) | 9005<br>(73%)  | 1.50 (0.86-2.65) | 204<br>(82%)   | 28782<br>(74%) | 1.56 (1.12-2.18) |
|                                  |             |               | 1.38 (0.24)      |             |               | 0.11 (0.74)      |             |               | 4.19 (0.04)      |             |                | 2.27 (0.13)      |                |                | 7.47 (0.006)     |
| <b>Cesarean section</b>          | 24<br>(71%) | 4492<br>(59%) | 1.67 (0.76-3.73) | 42<br>(84%) | 6260<br>(70%) | 2.25 (1.01-5.19) | 69<br>(86%) | 7202<br>(72%) | 2.44 (1.25-4.88) | 78<br>(91%) | 8511<br>(69%)  | 4.38 (2.04-9.79) | 213<br>(85%)   | 26449<br>(68%) | 2.71 (1.89-3.91) |
|                                  |             |               | 1.88 (0.17)      |             |               | 4.65 (0.03)      |             |               | 8.01 (0.005)     |             |                | 18.85 (0.00001)  |                |                | 33.83 (0.0000)   |
| <b>Multiple births</b>           | 6<br>(18%)  | 1904<br>(25%) | 0.64 (0.24-1.63) | 10<br>(20%) | 2325<br>(26%) | 0.71 (0.33-1.48) | 13<br>(16%) | 2901<br>(29%) | 0.48 (0.25-0.89) | 25<br>(29%) | 4071<br>(33%)  | 0.83 (0.51-1.36) | 54<br>(22%)    | 11280<br>(29%) | 0.67 (0.49-0.92) |
|                                  |             |               | 0.98 (0.32)      |             |               | 0.93 (0.33)      |             |               | 6.28 (0.01)      |             |                | 0.60 (0.44)      |                |                | 6.61 (0.01)      |
| <b>Congenital anomalies</b>      | 1<br>(3%)   | 305<br>(4%)   | 0.73 (---)       | 2<br>(4%)   | 447<br>(5%)   | 0.79 (0.13-3.33) | 5<br>(6%)   | 500<br>(5%)   | 1.27 (0.45-3.27) | 7<br>(8%)   | 617<br>(5%)    | 1.68 (0.71-3.79) | 15<br>(6%)     | 1945<br>(5%)   | 1.21 (0.69-2.09) |
|                                  |             |               | 0.10 (0.75)      |             |               | 0.10 (0.75)      |             |               | 0.26 (0.61)      |             |                | 1.76 (0.18)      |                |                | 0.52 (0.47)      |
| <b>Small for gestational age</b> | 3<br>(9%)   | 1218<br>(16%) | 0.51 (0.12-1.74) | 4<br>(8%)   | 1252<br>(14%) | 0.53 (0.16-1.55) | 7<br>(9%)   | 2001<br>(20%) | 0.38 (0.16-0.86) | 14<br>(16%) | 3207<br>(26%)  | 0.55 (0.30-1.01) | 28<br>(11%)    | 7779<br>(20%)  | 0.50 (0.33-0.76) |
|                                  |             |               | 1.30 (0.25)      |             |               | 1.49 (0.22)      |             |               | 6.30 (0.01)      |             |                | 4.20 (0.04)      |                |                | 12.05 (0.0005)   |

Data are shown as number of cases and( %)

OR: odds ratio; 95% CI: 95% confidence interval; MH: Mantel-Haenszel estimate
