# Supplementary material for: Comparison of neonatal intensive care: Trento area versus Vermont Oxford Network
Source: PubMed Central journal article supplement (PMC2687545; doi:10.1186/1824-7288-35-5), 2009-03-14
Supplement: 1824-7288-35-5-S3.pdf [file 1824-7288-35-5-S3.pdf]

**Tab. 3.** Incidence of respiratory complications and related treatments in Trento and VON.

|                                    | 501-750 g   |               |                                     | 751-1000 g  |               |                                     | 1001-1250 g |               |                                     | 1251-1500 g |               |                                     | All 501-1500 g |                |                                     |
|------------------------------------|-------------|---------------|-------------------------------------|-------------|---------------|-------------------------------------|-------------|---------------|-------------------------------------|-------------|---------------|-------------------------------------|----------------|----------------|-------------------------------------|
|                                    | Trento      | VON           | OR (95% CI)<br>MH (p-value)         | Trento      | VON           | OR (95% CI)<br>MH (p-value)         | Trento      | VON           | OR (95% CI)<br>MH (p-value)         | Trento      | VON           | OR (95% CI)<br>MH (p-value)         | Trento         | VON            | OR (95% CI)<br>MH (p-value)         |
| <b>Number of cases</b>             | 34          | 7614          |                                     | 50          | 8943          |                                     | 80          | 10003         |                                     | 86          | 12335         |                                     | 250            | 38895          |                                     |
| <b>Intubation in delivery room</b> | 28<br>(82%) | 6167<br>(81%) | 1.09 (0.43-2.95)<br>0.04 (0.84)     | 36<br>(72%) | 6618<br>(74%) | 0.90 (0.47-1.76)<br>0.10 (0.75)     | 37<br>(46%) | 4901<br>(49%) | 0.90 (0.56-1.42)<br>0.24 (0.62)     | 12<br>(14%) | 3454<br>(28%) | 0.42 (0.22-0.79)<br>8.38 (0.004)    | 113<br>(45%)   | 21003<br>(54%) | 0.70 (0.54-0.91)<br>7.74 (0.005)    |
| <b>Surfactant prophylaxis</b>      | 28<br>(82%) | 3655<br>(48%) | 5.05 (1.99-13.6)<br>15.99 (0.00006) | 33<br>(66%) | 3935<br>(44%) | 2.47 (1.33-4.63)<br>9.76 (0.002)    | 28<br>(35%) | 2701<br>(27%) | 1.46 (0.89-2.36)<br>2.57 (0.11)     | 6<br>(7%)   | 1604<br>(13%) | 0.50 (0.20-1.20)<br>2.75 (0.097)    | 95<br>(38%)    | 11669<br>(30%) | 1.43 (1.10-1.86)<br>7.56 (0.006)    |
| <b>RDS</b>                         | 31<br>(91%) | 7157<br>(94%) | 0.66 (0.19-2.71)<br>0.48 (0.49)     | 38<br>(76%) | 7780<br>(87%) | 0.47 (0.24-0.96)<br>5.29 (0.02)     | 51<br>(64%) | 7202<br>(72%) | 0.68 (0.42-1.11)<br>2.67 (0.10)     | 35<br>(41%) | 6661<br>(54%) | 0.58 (0.37-0.92)<br>6.08 (0.014)    | 155<br>(62%)   | 28782<br>(74%) | 0.57 (0.44-0.75)<br>18.55 (0.00001) |
| <b>Pneumothorax</b>                | 2<br>(6%)   | 761<br>(10%)  | 0.56 (0.09-2.41)<br>0.64 (0.42)     | 1<br>(2%)   | 537<br>(6%)   | 0.32 (0.02-2.14)<br>1.42 (0.23)     | 5<br>(6%)   | 300<br>(3%)   | 2.16 (0.76-5.59)<br>2.86 (0.09)     | 2<br>(2%)   | 370<br>(3%)   | 0.77 (0.13-3.19)<br>0.13 (0.71)     | 10<br>(4%)     | 1945<br>(5%)   | 0.79 (0.40-1.53)<br>0.52 (0.47)     |
| <b>NCPAP</b>                       | 20<br>(59%) | 4492<br>(59%) | 0.99 (0.48-2.07)<br>0.00 (0.98)     | 32<br>(64%) | 6797<br>(76%) | 0.56 (0.30-1.04)<br>3.92 (0.05)     | 50<br>(63%) | 7102<br>(71%) | 0.68 (0.42-1.10)<br>2.78 (0.095)    | 38<br>(44%) | 7154<br>(58%) | 0.57 (0.37-0.90)<br>6.68 (0.01)     | 140<br>(56%)   | 25671<br>(66%) | 0.66 (0.51-0.85)<br>11.06 (0.0009)  |
| <b>Conventional ventilation</b>    | 30<br>(88%) | 7005<br>(92%) | 0.65 (0.22-2.19)<br>0.65 (0.42)     | 36<br>(72%) | 7602<br>(85%) | 0.45 (0.24-0.88)<br>6.57 (0.01)     | 39<br>(49%) | 6602<br>(66%) | 0.49 (0.31-0.78)<br>10.50 (0.001)   | 21<br>(24%) | 5551<br>(45%) | 0.39 (0.23-0.66)<br>14.63 (0.0001)  | 126<br>(50%)   | 26449<br>(68%) | 0.48 (0.37-0.62)<br>35.30 (0.00000) |
| <b>CLD after 28 days</b>           | 10<br>(29%) | 7005<br>(92%) | 0.04 (0.02-0.08)<br>174.65 (0.0000) | 10<br>(20%) | 6618<br>(74%) | 0.09 (0.04-0.18)<br>74.80 (0.00000) | 11<br>(14%) | 4301<br>(43%) | 0.21 (0.11-0.41)<br>27.73 (0.00000) | 2<br>(2%)   | 2714<br>(22%) | 0.08 (0.01-0.35)<br>19.35 (0.00001) | 33<br>(13%)    | 20614<br>(53%) | 0.13 (0.09-0.20)<br>157.8 (0.00000) |
| <b>CLD after 36 weeks</b>          | 5<br>(15%)  | 5330<br>(70%) | 0.07 (0.03-0.20)<br>49.05 (0.00000) | 6<br>(12%)  | 4382<br>(49%) | 0.14 (0.05-0.35)<br>27.24 (0.00000) | 2<br>(3%)   | 2701<br>(27%) | 0.07 (0.01-0.29)<br>24.28 (0.00000) | 0<br>(0%)   | 1850<br>(15%) | 0.00 (0.00-0.32)<br>15.15 (0.0001)  | 13<br>(5%)     | 14002<br>(36%) | 0.10 (0.05-0.17)<br>102.5 (0.00000) |

Data are shown as number of cases and (%)

OR: odds ratio; 95% CI: 95% confidence interval; MH: Mantel-Haenszel estimate
