# Supplementary material for: Comparison of neonatal intensive care: Trento area versus Vermont Oxford Network
Source: PubMed Central journal article supplement (PMC2687545; doi:10.1186/1824-7288-35-5), 2009-03-14
Supplement: 1824-7288-35-5-S4.pdf [file 1824-7288-35-5-S4.pdf]

**Tab. 4.** Incidence of non-respiratory complications and indomethacin administration in Trento and VON.

|                        | 501-750 g   |               |                                     | 751-1000 g  |               |                                     | 1001-1250 g |               |                                    | 1251-1500 g |               |                                  | All 501-1500 g |                |                                     |
|------------------------|-------------|---------------|-------------------------------------|-------------|---------------|-------------------------------------|-------------|---------------|------------------------------------|-------------|---------------|----------------------------------|----------------|----------------|-------------------------------------|
|                        | Trento      | VON           | OR (95% CI)                         | Trento      | VON           | OR (95% CI)                         | Trento      | VON           | OR (95% CI)                        | Trento      | VON           | OR (95% CI)                      | Trento         | VON            | OR (95% CI)                         |
|                        |             |               | MH ( $p$ -value)                    |             |               | MH ( $p$ -value)                    |             |               | MH ( $p$ -value)                   |             |               | MH ( $p$ -value)                 |                |                |                                     |
| <b>Number of cases</b> | 34          | 7614          |                                     | 50          | 8943          |                                     | 80          | 10003         |                                    | 86          | 12335         |                                  | 250            | 38895          |                                     |
| <b>PDA</b>             | 8<br>(24%)  | 4340<br>(57%) | 0.23 (0.10-0.64)<br>15.46 (0.00008) | 12<br>(24%) | 4561<br>(51%) | 0.30 (0.15-0.60)<br>14.50 (0.0001)  | 11<br>(14%) | 3301<br>(33%) | 0.32 (0.16-0.63)<br>13.33 (0.0003) | 5<br>(6%)   | 2344<br>(19%) | 0.26 (0.09-0.67)<br>9.69 (0.002) | 36<br>(14%)    | 14391<br>(37%) | 0.29 (0.20-0.41)<br>54.51 (0.00000) |
| <b>Indomethacin</b>    | 8<br>(24%)  | 4188<br>(55%) | 0.25 (0.10-0.58)<br>13.54 (0.0002)  | 11<br>(22%) | 4472<br>(50%) | 0.28 (0.14-0.57)<br>15.60 (0.00007) | 8<br>(10%)  | 3001<br>(30%) | 0.26 (0.12-0.56)<br>15.16 (0.0001) | 2<br>(2%)   | 1727<br>(14%) | 0.15 (0.02-0.60)<br>9.71 (0.002) | 29<br>(12%)    | 13224<br>(34%) | 0.25 (0.17-0.38)<br>55.65 (0.00000) |
| <b>NEC</b>             | 1<br>(3%)   | 761<br>(10%)  | 0.27 (0.01-1.86)<br>1.88 (0.17)     | 2<br>(4%)   | 715<br>(8%)   | 0.48 (0.08-2.01)<br>1.08 (0.30)     | 1<br>(1%)   | 500<br>(5%)   | 0.24 (0.01-1.60)<br>2.36 (0.12)    | 0<br>(0%)   | 370<br>(3%)   | 0.00 (0.00-1.82)<br>2.66 (0.10)  | 4<br>(2%)      | 2334<br>(6%)   | 0.25 (0.08-0.71)<br>8.57 (0.003)    |
| <b>IVH</b>             | 12<br>(35%) | 3502<br>(46%) | 0.64 (0.30-1.35)<br>1.56 (0.21)     | 16<br>(32%) | 2862<br>(32%) | 1.00 (0.53-1.88)<br>0.00 (0.10)     | 7<br>(9%)   | 2101<br>(21%) | 0.36 (0.15-0.81)<br>7.21 (0.007)   | 7<br>(8%)   | 1974<br>(16%) | 0.47 (0.20-1.05)<br>3.94 (0.05)  | 42<br>(17%)    | 10113<br>(26%) | 0.57 (0.41-0.81)<br>10.95 (0.0009)  |
| <b>I grade</b>         | 2<br>(6%)   | 914<br>(12%)  | 0.46 (0.08-1.96)<br>1.20 (0.27)     | 6<br>(12%)  | 1073<br>(12%) | 1.00 (0.38-2.45)<br>0.00 (0.10)     | 3<br>(4%)   | 1100<br>(11%) | 0.32 (0.08-1.04)<br>4.28 (0.04)    | 4<br>(5%)   | 1234<br>(10%) | 0.44 (0.14-1.24)<br>2.73 (0.98)  | 15<br>(6%)     | 4278<br>(11%)  | 0.52 (0.29-0.89)<br>6.36 (0.012)    |
| <b>II grade</b>        | 2<br>(6%)   | 838<br>(11%)  | 0.51 (0.08-2.16)<br>0.91 (0.34)     | 3<br>(6%)   | 626<br>(7%)   | 0.85 (0.21-2.84)<br>0.08 (0.78)     | 1<br>(1%)   | 500<br>(5%)   | 0.24 (0.01-1.60)<br>2.36 (0.12)    | 1<br>(1%)   | 370<br>(3%)   | 0.38 (0.02-2.52)<br>0.99 (0.32)  | 7<br>(3%)      | 2334<br>(6%)   | 0.45 (0.20-0.99)<br>4.53 (0.03)     |
| <b>III grade</b>       | 5<br>(15%)  | 685<br>(9%)   | 1.74 (0.59-4.74)<br>1.34 (0.25)     | 2<br>(4%)   | 537<br>(6%)   | 0.65 (0.11-2.74)<br>0.35 (0.55)     | 2<br>(3%)   | 300<br>(3%)   | 0.83 (0.0-3.45)<br>0.07 (0.79)     | 0<br>(0%)   | 247<br>(2%)   | 0.00 (0.00-2.77)<br>1.76 (0.18)  | 9<br>(4%)      | 1556<br>(4%)   | 0.90 (0.43-1.80)<br>0.10 (0.75)     |
| <b>IV grade</b>        | 3<br>(9%)   | 1066<br>(14%) | 0.59 (0.14-2.03)<br>0.75 (0.38)     | 5<br>(10%)  | 626<br>(7%)   | 1.48 (0.51-3.90)<br>0.69 (0.41)     | 1<br>(1%)   | 200<br>(2%)   | 0.62 (0.03-4.14)<br>0.23 (0.63)    | 2<br>(2%)   | 123<br>(1%)   | 2.36 (0.0-9.90)<br>1.51 (0.22)   | 11<br>(4%)     | 1945<br>(5%)   | 0.87 (0.45-1.64)<br>0.19 (0.66)     |
| <b>Cystic PVL</b>      | 1<br>(3%)   | 381<br>(5%)   | 0.58 (0.03-3.92)<br>0.30 (0.58)     | 1<br>(2%)   | 358<br>(4%)   | 0.49 (0.03-3.29)<br>0.52 (0.47)     | 2<br>(3%)   | 300<br>(3%)   | 0.83 (0.0-3.45)<br>0.07 (0.79)     | 2<br>(2%)   | 247<br>(2%)   | 1.17 (0.0-4.84)<br>0.05 (0.83)   | 6<br>(2%)      | 1167<br>(3%)   | 0.79 (0.32-1.85)<br>0.31 (0.58)     |

Data are shown as number of cases and( %)

OR: odds ratio; 95% CI: 95% confidence interval; MH: Mantel-Haenszel estimate
