# Supplementary material for: Comparison of neonatal intensive care: Trento area versus Vermont Oxford Network
Source: PubMed Central journal article supplement (PMC2687545; doi:10.1186/1824-7288-35-5), 2009-03-14
Supplement: 1824-7288-35-5-S5.pdf [file 1824-7288-35-5-S5.pdf]

**Tab. 5.** Incidence of ROP and mortality in Trento and VON.

|                                  | 501-750 g   |               |                                   | 751-1000 g  |               |                                     | 1001-1250 g |               |                                         | 1251-1500 g |                |                                     | All 501-1500 g |                |                                     |
|----------------------------------|-------------|---------------|-----------------------------------|-------------|---------------|-------------------------------------|-------------|---------------|-----------------------------------------|-------------|----------------|-------------------------------------|----------------|----------------|-------------------------------------|
|                                  | Trento      | VON           | OR (95% CI)                       | Trento      | VON           | OR (95% CI)                         | Trento      | VON           | OR (95% CI)                             | Trento      | VON            | OR (95% CI)                         | Trento         | VON            | OR (95% CI)                         |
|                                  |             |               | MH ( $p$ -value)                  |             |               | MH ( $p$ -value)                    |             |               | MH ( $p$ -value)                        |             |                | MH ( $p$ -value)                    |                |                |                                     |
| <b>Number of cases</b>           | 34          | 7614          |                                   | 50          | 8943          |                                     | 80          | 10003         |                                         | 86          | 12335          |                                     | 250            | 38895          |                                     |
| <b>ROP screening</b>             | 23<br>(68%) | 4797<br>(63%) | 1.23 (0.57-2.68)<br>0.31 (0.58)   | 43<br>(86%) | 7244<br>(81%) | 1.44 (0.62-3.51)<br>0.81 (0.37)     | 72<br>(90%) | 7502<br>(75%) | 3.00 (1.39-6.73)<br>9.56 (0.002)        | 70<br>(81%) | 6661<br>(54%)  | 3.73 (2.11-6.68)<br>25.8 (0.000004) | 208<br>(83%)   | 26060<br>(67%) | 2.44 (1.73-3.45)<br>29.5 (0.000001) |
| <b>ROP positives</b>             | 14<br>(61%) | 3789<br>(79%) | 0.41 (0.17-1.04)<br>4.51 (0.03)   | 11<br>(26%) | 4057<br>(56%) | 0.27 (0.13-0.56)<br>16.04 (0.00006) | 3<br>(4%)   | 2101<br>(28%) | 0.11 (0.03-0.37)<br>20.20<br>(0.000007) | 0<br>(0%)   | 866<br>(13%)   | 0.00 (0.00-0.46)<br>10.44 (0.001)   | 28<br>(13%)    | 10684<br>(41%) | 0.22 (0.15-0.34)<br>64.7 (0.000000) |
| <b>ROP severe grade (III-IV)</b> | 5<br>(22%)  | 1487<br>(31%) | 0.62 (0.20-1.77)<br>0.92 (0.34)   | 3<br>(7%)   | 869<br>(12%)  | 0.55 (0.14-1.85)<br>1.02 (0.31)     | 0<br>(0%)   | 225<br>(3%)   | 0.00 (0.00-2.19)<br>2.23 (0.14)         | 0<br>(0%)   | 67<br>(1%)     | 0.00 (0.00-6.93)<br>0.71 (0.40)     | 8<br>(4%)      | 2606<br>(10%)  | 0.36 (0.16-0.75)<br>8.72 (0.003)    |
| <b>Need for surgical interv.</b> | 2<br>(9%)   | 240<br>(5%)   | 1.81 (0.42-7.64)<br>0.65 (0.42)   | 1<br>(2%)   | 1087<br>(15%) | 0.13 (0.01-0.91)<br>5.41 (0.02)     | 0<br>(0%)   | 525<br>(7%)   | 0.00 (0.00-0.90)<br>5.41 (0.02)         | 0<br>(0%)   | 67<br>(1%)     | 0.00 (0.00-6.93)<br>0.71 (0.40)     | 3<br>(1%)      | 1919<br>(7%)   | 0.18 (0.05-0.59)<br>10.67 (0.001)   |
| <b>Deceased</b>                  | 11<br>(32%) | 3350<br>(44%) | 0.61 (0.28-1.31)<br>1.86 (0.17)   | 7<br>(14%)  | 1252<br>(14%) | 1.00 (0.41-2.32)<br>0.00 (0.99)     | 3<br>(4%)   | 600<br>(6%)   | 0.61 (0.15-2.01)<br>0.71 (0.40)         | 3<br>(3%)   | 493<br>(4%)    | 0.87 (0.22-2.85)<br>0.06 (0.81)     | 24<br>(10%)    | 5445<br>(14%)  | 0.65 (0.42-1.01)<br>4.00 (0.045)    |
| <b>Discharged</b>                | 23<br>(68%) | 4264<br>(56%) | 1.64 (0.76-3.59)<br>1.86 (0.17)   | 43<br>(86%) | 7691<br>(86%) | 1.00 (0.43-2.44)<br>0.00 (0.99)     | 77<br>(96%) | 9403<br>(94%) | 1.64 (0.50-6.51)<br>0.71 (0.40)         | 83<br>(97%) | 11842<br>(96%) | 1.15 (0.35-4.57)<br>0.06 (0.81)     | 226<br>(90%)   | 33450<br>(86%) | 1.53 (0.99-2.39)<br>4.00 (0.045)    |
| <b>Discharged on human milk</b>  | 15<br>(65%) | 1407<br>(33%) | 3.81 (1.52-9.81)<br>10.71 (0.001) | 36<br>(84%) | 2923<br>(38%) | 8.39 (3.57-20.6)<br>37.83 (0.00000) | 62<br>(81%) | 4701<br>(50%) | 4.13 (2.29-7.59)<br>28.4 (0.000001)     | 75<br>(90%) | 1421<br>(12%)  | 68.7 (31.9-154)<br>461 (0.000000)   | 188<br>(83%)   | 14718<br>(44%) | 6.30 (4.39-9.07)<br>139.7 (0.00000) |

Data are shown as number of cases and( %)

OR: odds ratio; 95% CI: 95% confidence interval; MH: Mantel-Haenszel estimate
